# Supplementary material
Source: HighWire-hosted journal article supplement (https://jnm.snmjournals.org/highwire/filestream/95437/field_highwire_adjunct_files/0/220293_Supplemental_Data.pdf)
Supplement: 220293_Supplemental_Data.pdf [file 220293_Supplemental_Data.pdf]

Supplemental Table 1: The protocol for the PET/MRI system for pre- and postoperative scans

|                                                  | Protocol                         | Parameters                                | Voxel size<br>(mm) | Slice-<br>gap |
|--------------------------------------------------|----------------------------------|-------------------------------------------|--------------------|---------------|
| 3D                                               | T1 MPRAGE                        | 9° flip angle; TR/TE/TI 1900/2.52/900 ms  | 1x1x1              | -             |
| or Axial                                         | T1-TIRM                          | 150° flip angle; TR/TE/TI 2000/34/800 ms  | 0.45x0.45x4        | 1.2 mm        |
| Axial +<br>Coronal                               | T2-FLAIR<br>(TIRM<br>dark-fluid) | 130° flip angle; TR/TE/TI 9000/95/2500 ms | 0.43x0.43x4        | 0.4 mm        |
| Axial                                            | DWI<br>(RESOLVE)                 | 180° flip angle; TR/TE 5600/61 ms         | 1.15x1.15x4        | 1.2 mm        |
| Intravenous contrast medium Gadovist 0.1 mmol/kg |                                  |                                           |                    |               |
| Axial                                            | T2 BLADE                         | 140° flip angle; TR/TE 4000/118 ms        | 0.72x0.72x5        | 1.5 mm        |
| 3D                                               | T1 MPRAGE                        | 9° flip angle; TR/TE/TI 1900/2.52/900 ms  | 1x1x1              | -             |

MPRAGE: 3D-T1 magnetization prepared rapid gradient echo, TR: repetition time, TE: echo time TI: inversion time, DWI (diffusion weighted imaging): susceptibility-compensated, BLADE: with rotated parallel sampling to compensate motion.

Supplemental Table 2. STARD 2015 checklist.

| Section & Topic          | No  | Item                                                                                                                                                   | Reported on page # |
|--------------------------|-----|--------------------------------------------------------------------------------------------------------------------------------------------------------|--------------------|
| <b>TITLE OR ABSTRACT</b> |     |                                                                                                                                                        |                    |
|                          | 1   | Identification as a study of diagnostic accuracy using at least one measure of accuracy (such as sensitivity, specificity, predictive values, or AUC)  | 2                  |
| <b>ABSTRACT</b>          |     |                                                                                                                                                        |                    |
|                          | 2   | Structured summary of study design, methods, results, and conclusions (for specific guidance, see STARD for Abstracts)                                 | 2                  |
| <b>INTRODUCTION</b>      |     |                                                                                                                                                        |                    |
|                          | 3   | Scientific and clinical background, including the intended use and clinical role of the index test                                                     | 3-4                |
|                          | 4   | Study objectives and hypotheses                                                                                                                        | 4                  |
| <b>METHODS</b>           |     |                                                                                                                                                        |                    |
| <i>Study design</i>      | 5   | Whether data collection was planned before the index test and reference standard were performed (prospective study) or after (retrospective study)     | 4-5                |
| <i>Participants</i>      | 6   | Eligibility criteria                                                                                                                                   | 4                  |
|                          | 7   | On what basis potentially eligible participants were identified (such as symptoms, results from previous tests, inclusion in registry)                 | 4                  |
|                          | 8   | Where and when potentially eligible participants were identified (setting, location and dates)                                                         | 4                  |
|                          | 9   | Whether participants formed a consecutive, random or convenience series                                                                                | 4                  |
| <i>Test methods</i>      | 10a | Index test, in sufficient detail to allow replication                                                                                                  | 6-7+table 1        |
|                          | 10b | Reference standard, in sufficient detail to allow replication                                                                                          | 6-7                |
|                          | 11  | Rationale for choosing the reference standard (if alternatives exist)                                                                                  | 7                  |
|                          | 12a | Definition of and rationale for test positivity cut-offs or result categories of the index test, distinguishing pre-specified from exploratory         | 6                  |
|                          | 12b | Definition of and rationale for test positivity cut-offs or result categories of the reference standard, distinguishing pre-specified from exploratory | 7                  |
|                          | 13a | Whether clinical information and reference standard results were available to the performers/readers of the index test                                 | 6-7                |
|                          | 13b | Whether clinical information and index test results were available to the assessors of the reference standard                                          | 6-7                |
| <i>Analysis</i>          | 14  | Methods for estimating or comparing measures of diagnostic accuracy                                                                                    | 7                  |
|                          | 15  | How indeterminate index test or reference standard results were handled                                                                                | 7                  |
|                          | 16  | How missing data on the index test and reference standard were handled                                                                                 | Table 1            |
|                          | 17  | Any analyses of variability in diagnostic accuracy, distinguishing pre-specified from exploratory                                                      | No                 |
|                          | 18  | Intended sample size and how it was determined                                                                                                         | No                 |
| <b>RESULTS</b>           |     |                                                                                                                                                        |                    |
| <i>Participants</i>      | 19  | Flow of participants, using a diagram                                                                                                                  | 4-5                |
|                          | 20  | Baseline demographic and clinical characteristics of participants                                                                                      | 4                  |
|                          | 21a | Distribution of severity of disease in those with the target condition                                                                                 | Table 1            |
|                          | 21b | Distribution of alternative diagnoses in those without the target condition                                                                            | No                 |
|                          | 22  | Time interval and any clinical interventions between index test and reference standard                                                                 | Table 1            |
| <i>Test results</i>      | 23  | Cross tabulation of the index test results (or their distribution) by the results of the reference standard                                            | Table 1            |
|                          | 24  | Estimates of diagnostic accuracy and their precision (such as 95% confidence intervals)                                                                | Table 2            |
|                          | 25  | Any adverse events from performing the index test or the reference standard                                                                            | No                 |
| <b>DISCUSSION</b>        |     |                                                                                                                                                        |                    |
|                          | 26  | Study limitations, including sources of potential bias, statistical uncertainty, and generalisability                                                  | 11                 |
|                          | 27  | Implications for practice, including the intended use and clinical role of the index test                                                              | 11                 |
| <b>OTHER INFORMATION</b> |     |                                                                                                                                                        |                    |
|                          | 28  | Registration number and name of registry                                                                                                               | NCT03402425        |
|                          | 29  | Where the full study protocol can be accessed                                                                                                          | NCT03402425        |
